# Supplementary material
Source: MDPI journal article supplement (https://www.mdpi.com/2071-1050/14/19/12434)
Supplement: s1 [file s1 › Supplementary File S1 - Questionnaire.pdf]

## Survey on the values, competences of teachers and sustainability of the university

With your kind permission, we would like to ask you respectfully to answer the following questions. We very much hope that, based on your opinions, we will be able to gain inspiration and suggestions on how to help our university become better than before. Please, have the greatest sincerity, because only sincere opinions can move our university forward. At the same time, we guarantee you absolute credibility and anonymity in dealing with your statements.

Thank you very much in advance for expressing your opinions.

.....  
☐ Female      ☐ Male

For lecturers:      ☐ PhD.      ☐ Assoc. Professor      ☐ Professor  
For students:      ☐ Bachelor study      ☐ Master study      ☐ PhD. study  
.....

---

### Values of great university

---

Please, assign all of the **values** which should govern a great higher education institution, on a scale from 1 to 10, depending on how significant you think they are (1 = least important value; 10 = most important value):

|    | Values important for a modern university                                                                    | Importance<br>1 – 10 |
|----|-------------------------------------------------------------------------------------------------------------|----------------------|
| 1  | <b>Compliance with the rules</b> (promises, terms, laws, goals, honesty, respect, esteem)                   |                      |
| 2  | <b>Evaluation and classification</b> (legitimacy, bonus points, second chance, adequacy of demands)         |                      |
| 3  | <b>Awareness and involvement</b> (awareness, transparency, use of ideas)                                    |                      |
| 4  | <b>Communication</b> (courtesy, expression of opinion, personal approach, tact, sincerity, listening)       |                      |
| 5  | <b>Quality of educating</b> (expertise, education, wisdom, level of graduates)                              |                      |
| 6  | <b>Modernization</b> (modern approaches, innovativeness, computerization, dynamics, flexibility)            |                      |
| 7  | <b>Motivation</b> (of employees, students, enthusiasm, devotion, reward, appreciation, joy)                 |                      |
| 8  | <b>Lecturers</b> (competency, objectivity, fairness, impartiality, professionalism, literature)             |                      |
| 9  | <b>Connection with practice</b> (practical experience, usefulness of subjects for practice, excursions)     |                      |
| 10 | <b>Approach</b> (consideration, loyalty, humanity, empathy, support, decency)                               |                      |
| 11 | <b>Reputation</b> (market attractiveness, university reputation, history, success, recognition, references) |                      |
| 12 | <b>Cooperation</b> (participation, partner network, joint activities, cohesion, team work)                  |                      |
| 13 | <b>Students</b> (enthusiasm, self-confidence, commitment, self-realization, self-sufficiency, exercise)     |                      |
| 14 | <b>Improvement and sustainability</b> (progress, responsible development, progress, research & science)     |                      |
| 15 | <b>Relationships</b> (fair dealing, positive relationship with teachers, mutual help, companionship)        |                      |

Which of the listed values do you consider **most important** (give its number): .....

---

---

## Personal values in professional and private life

---

---

Please, assign all of the **personal values** on a scale from 1 to 10, depending on how significant you think they are in **your professional and private life** (1 = least important value; 10 = most important value):

|    | Values important to your professional and private life                                                          | Importance<br>1 – 10 |
|----|-----------------------------------------------------------------------------------------------------------------|----------------------|
| 1  | <b>Adventure</b> (playfulness, ambition, travel, experience, cognition, discovery)                              |                      |
| 2  | <b>Compliance with the rules</b> (honesty, self-discipline, responsibility, respect, equality)                  |                      |
| 3  | <b>Finance</b> (well-being, material property, material security, money)                                        |                      |
| 4  | <b>Communication</b> (openness, active listening, advocacy, courtesy, personal approach)                        |                      |
| 5  | <b>Creativity</b> (creativeness, desire to try new things, inspiration, difference, diversity, beauty)          |                      |
| 6  | <b>Motivation</b> (intellectual stimulation, joy, progress, dreams, feeling good, satisfaction)                 |                      |
| 7  | <b>Work</b> (career, performance, success, recognition, fame, commitment, consistency)                          |                      |
| 8  | <b>Approach to fulfilling tasks</b> (professionalism, rationality, insight, seriousness, diligence)             |                      |
| 9  | <b>Approach to others</b> (consideration, loyalty, empathy – altruism, decency, integrity)                      |                      |
| 10 | <b>Family</b> (children, partner, marriage, relatives, background)                                              |                      |
| 11 | <b>Leisure</b> (hobby, interests)                                                                               |                      |
| 12 | <b>Education</b> (wisdom, desire to learn, foreign language, general overview)                                  |                      |
| 13 | <b>Relations and trust</b> (be kind to others, trust in other/in yourself, love, togetherness, happiness, hope) |                      |
| 14 | <b>Health</b> (good sleep, food, care)                                                                          |                      |
| 15 | <b>Lifestyle</b> (living to the fullest, standard of living, harmony, art, spirituality, mission, meaning)      |                      |

Which of the listed values do you consider **most important** in your life (give its number): .....

---

---

**Attributes of a great lecturer – this is what a great university lecturer should be like**

---

---

Please assign importance to each of the following **attributes** on a scale of 1–10 as you think a **great university lecturer** should have them (1 = least important attribute; 10 = most important attribute):

|    | <b>Attributes of a great lecturer</b>   | <b>Importance 1 – 10</b> |
|----|-----------------------------------------|--------------------------|
| 1  | Expertise and professionalism           |                          |
| 2  | Pedagogical skills                      |                          |
| 3  | Justice and objectivity                 |                          |
| 4  | Skills to motivate and inspire          |                          |
| 5  | Tolerance and patience                  |                          |
| 6  | Friendliness and willingness to help    |                          |
| 7  | Communicativeness and comprehensibility |                          |
| 8  | Empathy and humanity                    |                          |
| 9  | Charismatic personality                 |                          |
| 10 | Decency, honesty, courtesy              |                          |

Which of the listed attributes do you consider **most important** (give its number): .....

---

---

**Attributes of an unsuitable lecturer – this should not be a lecturer of a great university**

---

---

Please, assign a weight of inadequacy to each of the following attributes on a scale of 1–10, as you think a university teacher should not have (1 = least inappropriate; 10 = most inappropriate):

|    | <b>Attributes of an inappropriate university lecturer</b> | <b>Importance 1 – 10</b> |
|----|-----------------------------------------------------------|--------------------------|
| 1  | Arrogance and shoddy                                      |                          |
| 2  | Unprofessionalism, obsolescence of knowledge              |                          |
| 3  | Injustice and bias                                        |                          |
| 4  | Reluctance and disinterest                                |                          |
| 5  | Moodiness and nervousness                                 |                          |
| 6  | Too high criticality and demands                          |                          |
| 7  | Monotonous, unintelligible speech                         |                          |
| 8  | Dishonesty                                                |                          |
| 9  | Malice and hostility                                      |                          |
| 10 | Vulgarity and indecency                                   |                          |

Which of the listed attributes do you consider **most unacceptable** (give its number): .....

---

---

### Principles of university sustainability

---

---

Please, rate the following **principles of sustainability** that should guide a great university on a scale of 1 – 10, depending on how important you think they are (1 = least important principle; 10 = most important principle):

|    | Principles of sustainability of a great university                              | Importance<br>1 – 10 |
|----|---------------------------------------------------------------------------------|----------------------|
| 1  | Principle of activating creativity and wisdom                                   |                      |
| 2  | Principle of efficiency (3E): economical, efficient and effective action        |                      |
| 3  | Principle of generational responsibility (towards future generations)           |                      |
| 4  | Principle of the lowest environmental burden                                    |                      |
| 5  | Principle of zero error in proceedings and processes                            |                      |
| 6  | Principle of justifiable benefit in case of justifiable risk                    |                      |
| 7  | Principle of permanent progress and cultivation                                 |                      |
| 8  | Principle of social responsibility (to employees, students, society, the world) |                      |
| 9  | Principle of synergetic and multiplicative action                               |                      |
| 10 | Principle of environmental improvement                                          |                      |

Which of the listed principles do you consider **most important** (give its number): .....

---

---

### Level of university sustainability

---

---

Please assign a **true level** on a scale of 1 – 10 to all of the following **sustainability principles** that should guide a great university, according to how **your university fulfills them** (1 = least fulfilled principle; 10 = most fulfilled principle):

|    | Principles of sustainability of your university                                 | Achieved level<br>1 – 10 |
|----|---------------------------------------------------------------------------------|--------------------------|
| 1  | Principle of activating creativity and wisdom                                   |                          |
| 2  | Principle of efficiency (3E): economical, efficient and effective action        |                          |
| 3  | Principle of generational responsibility (towards future generations)           |                          |
| 4  | Principle of the lowest environmental burden                                    |                          |
| 5  | Principle of zero error in proceedings and processes                            |                          |
| 6  | Principle of justifiable benefit in case of justifiable risk                    |                          |
| 7  | Principle of permanent progress and cultivation                                 |                          |
| 8  | Principle of social responsibility (to employees, students, society, the world) |                          |
| 9  | Principle of synergetic and multiplicative action                               |                          |
| 10 | Principle of environmental improvement                                          |                          |

Which of the listed principles do you consider **most respected** (give its number): .....

Thank you very much
